# Supplementary material for: A Comprehensive Examination of Severely Ill ME/CFS Patients
Source: MDPI journal article supplement (doi:10.3390/healthcare9101290), 2021-09-29
Supplement: s1 [file s1]

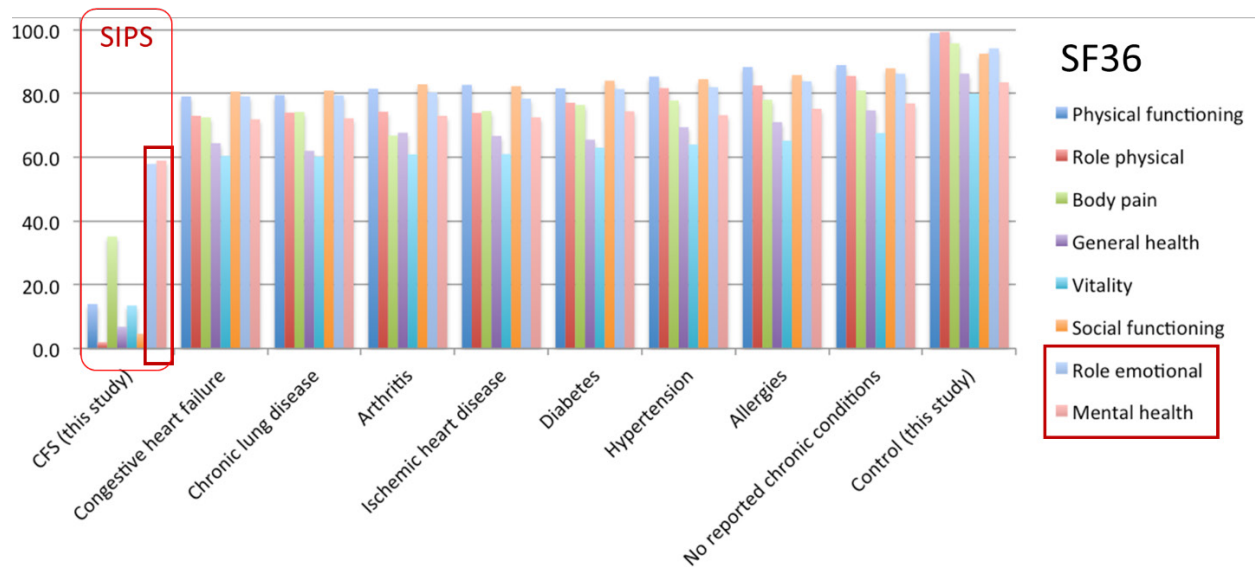

(a)

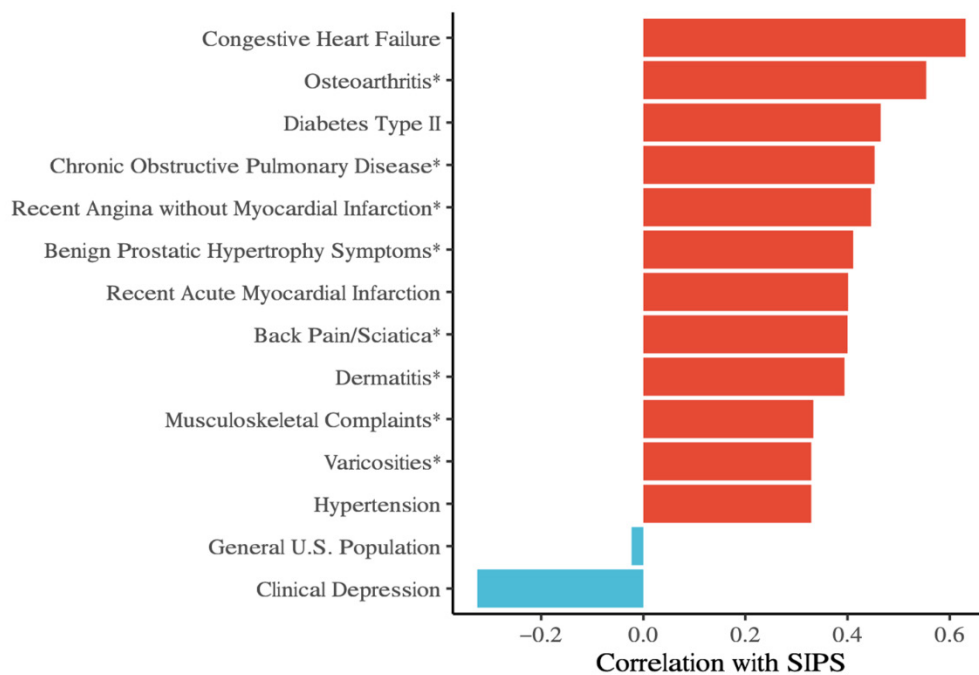

(b)

**Figure S1** Comparison of the Quality of Life of Severely Ill ME/CFS and Other Major Diseases. (a) The SF-36 results showed that SIPS patients had significantly lower scores. In particular, scores on Physical functioning (PF), Role limitations due to physical health (RP), General health (GH), Vitality/Energy/Fatigue (VT), and Social functioning (SF) were extremely low, while Role Limitations due to emotional problems (RE) and Mental health/Emotional well-being (MH) were less impacted. (b) Among other major medical conditions, the quality-of-life scores of the SIPS patients were most positively correlated with Congestive Heart Failure ( $r=0.63$ ) and most negatively correlated with Clinical depression ( $r=-0.33$ ).

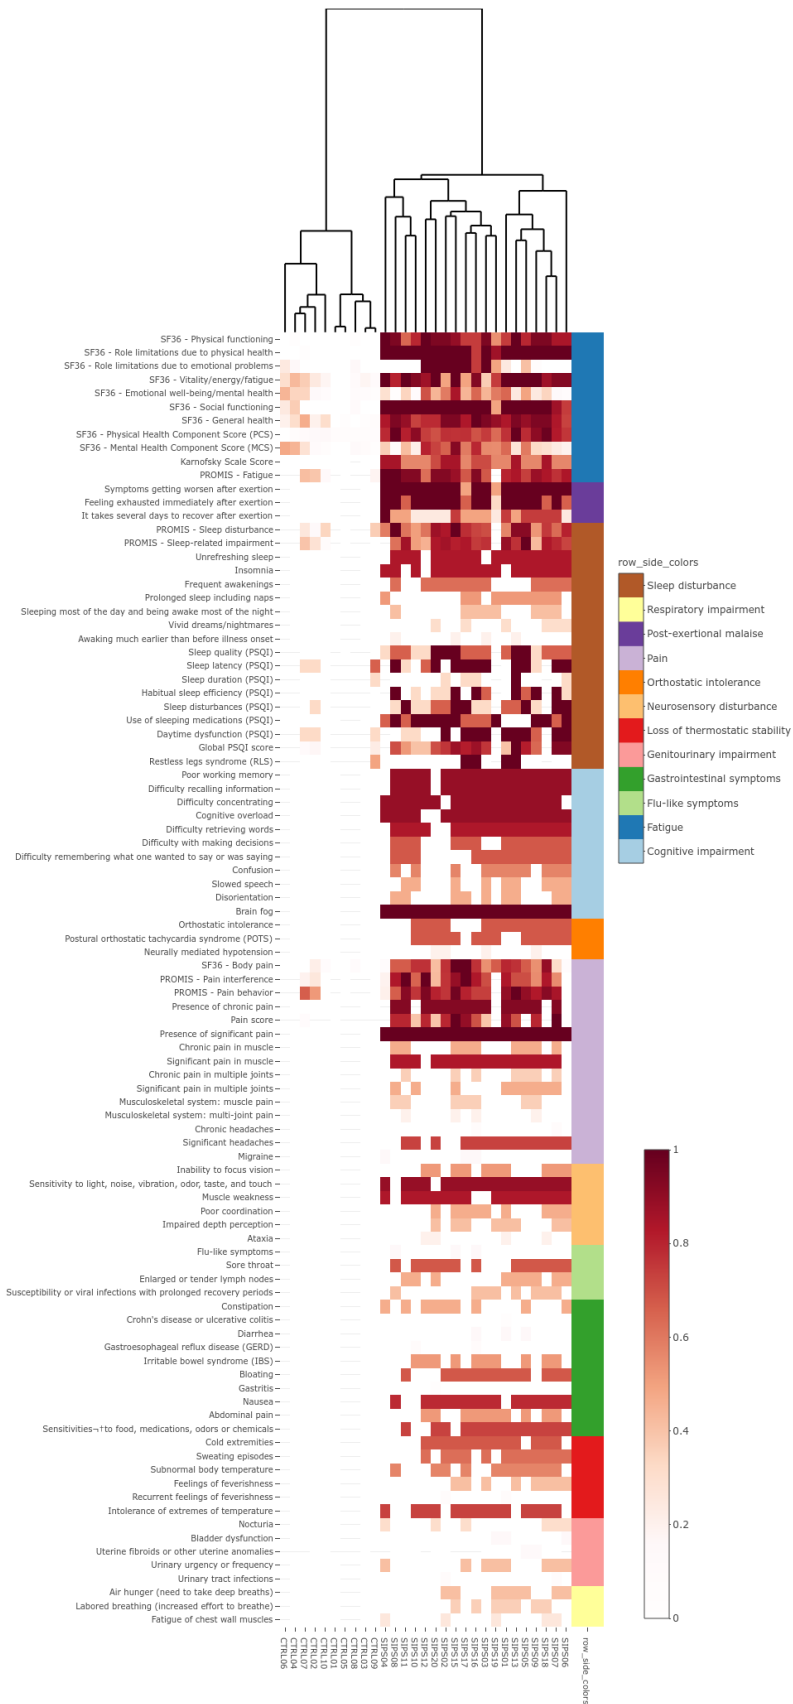

(a)

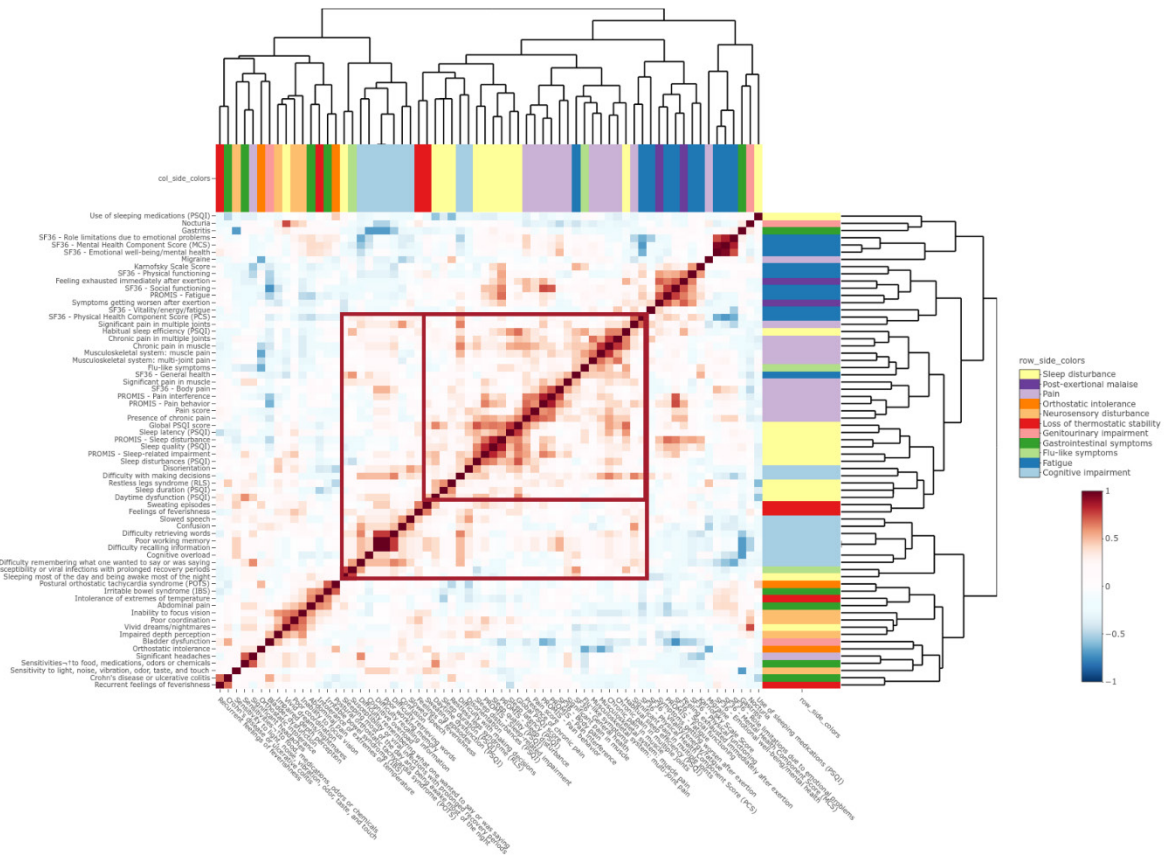

(b)

**Figure S2** Similarities and Differences in Clinical Symptoms across 20 SIPS Patients. (a) Shown are results from the questionnaires on whether a patient or a control had a particular condition or the degree of the condition. (b) Hierarchical clustering of these conditions between the patients. Symptoms related to sleep disturbance and symptoms related to pain apparently clustered together.
