# Supplementary material for: A Comprehensive Examination of Severely Ill ME/CFS Patients
Source: Healthcare (Basel). 2021 Sep 29;9(10):1290. doi: 10.3390/healthcare9101290 (PMC8535418; doi:10.3390/healthcare9101290)
Supplement: Supplementary file 1 [file healthcare-09-01290-s001.zip › healthcare-1385639_supplementary tables_revised_09182021.xlsx]

## Sheet: Table S1
Clinical Lab Tests	Significance (FDR)	Mean_SIPS	Mean_SIPSHC	Median_SIPS	Median_SIPSHC
2 Methylacetoacetic	NA	0	0	0	0
2 Methylbutyrylglycine	NA	0	0	0	0
2-ET-3OHPropionic	0.798	2.07692	2.6	0	2
2-Hydroxyadipic	0.339429	0.0769231	0	0	0
2-Hydroxybutric	NA	0	0	0	0
2-Hydroxyglutaric	0.822	7.38462	9.8	7	4
2-Hydroxyisocaproic	NA	0	0	0	0
2-Hydroxyisovaleric	0.9886	0.384615	0.2	0	0
2-Mehtyl, 3-Hydroxybutryic	0.955237	1.38462	0.6	0	0
2-OH-3Me-Valeric	NA	0	0	0	0
2-Oxo, 3-Methylvaleric	NA	0	0	0	0
2-Oxoadipic	NA	0	0	0	0
2-Oxoglutaric	0.983124	17.0769	12.2	8	6
2-Oxoisocaproic	NA	0	0	0	0
2-Oxoisovaleric	NA	0	0	0	0
3 Hydroxysabacic	NA	0	0	0	0
3-Hydroxyadipic	0.983124	1.76923	1.4	1	1
3-Hydroxybutyric	0.798	2.38462	4.6	0	1
3-Hydroxyglutaric	0.890262	0.307692	0	0	0
3-Hydroxyisobutyric	0.799535	14.9231	13	14	13
3-Hydroxyisovaleric	0.673	4.07692	8	4	5
3-Hydroxypropionic	0.787636	4.38462	4.8	4	4
3-Hydroxyvaleric	NA	0	0	0	0
3-Methylcrotonylglycine	NA	0	0	0	0
3-Methylglutaconic	0.927714	1.61538	1.8	1	2
3-Methylglutaric	NA	0	0	0	0
3-OH-3-Methylglutaric	0.940431	1.15385	1.2	0	1
4 Hydroxybutyric	NA	0	0	0	0
4 Hydroxycyclohexaneacetic	NA	0	0	0	0
4-Hydroxyphenyllactic	0.983124	0.538462	1.2	0	0
4-Hydroxyphenylpyruvic	NA	0	0	0	0
4-Hydroxypheylacetic	0.822	18	16.6	11	10
5-Hydroxyhexanoic	0.769021	0.538462	1.6	0	1
5-Oxoproline	0.820645	13.7692	15.2	11	12
Acetoacetic	0.694884	1.61538	2.4	0	1
Acetylcarnitine, C2	0.983124	6.28684	6.02667	4.72	4.22
Aconitic	0.9886	44.7692	42.6	38	42
Adipic	0.983124	1.53846	1.4	2	1
Adipolycarnitine, C6DC	NA	0.018	0.019	0.018	0.019
Albumin	0.06	4.18889	4.6	4.25	4.5
Albumin, Serum	0.787636	4.22353	4.27778	4.3	4.5
Albumin/Globulin Ratio	0.927714	1.64444	1.72222	1.7	1.7
Alkaine Phosphatase	0.576	81.1667	65.2222	83.5	63
ALT	0.78675	24.0056	17.1111	21	16
Ammonia, Plasma	0.799535	43.2105	38	45	38
Arginine Vasopressin (AVP, Antidiuretic Hormone)	0.822	1.24059	1.18333	0.95	0.99
AST	0.769021	23.2222	19.3333	22	19
Bilirubin, Total	0.06	0.411111	0.622222	0.4	0.6
Borrelia burgdorferi 18 KD (IgG) Band	NA	0	0	0	0
Borrelia burgdorferi 23 KD (IgG) Band	0.787636	0.111111	0	0	0
Borrelia burgdorferi 23 KD (IgM) Band	0.7432	0.0555556	0	0	0
Borrelia burgdorferi 28 KD (IgG) Band	NA	0	0	0	0
Borrelia burgdorferi 30 KD (IgG) Band	0.983124	0.111111	0.111111	0	0
Borrelia burgdorferi 39 KD (IgG) Band	NA	0	0	0	0
Borrelia burgdorferi 39 KD (IgM) Band	NA	0	0	0	0
Borrelia burgdorferi 41 KD (IgG) Band	0.787636	0.666667	0.444444	1	0
Borrelia burgdorferi 41 KD (IgM) Band	0.822	0.0555556	0.111111	0	0
Borrelia burgdorferi 45 KD (IgG) Band	NA	0	0	0	0
Borrelia burgdorferi 58 KD (IgG) Band	NA	0	0	0	0
Borrelia burgdorferi 66 KD (IgG) Band	0.940431	0.111111	0.111111	0	0
Borrelia burgdorferi 93 KD (IgG) Band	NA	0	0	0	0
Bun/Creatinine Ratio	NA	22.5	NA	22.5	NA
C-Reactive Protein (CRP)	0.798	0.265	0.164333	0.11	0.098
Calcium	0.45	9.13889	9.45556	9.15	9.5
Carbon Dioxide	0.983124	26.9444	27.1111	26.5	26
CBC - % Basophils	0.983124	0.410526	0.466667	0.4	0.5
CBC - % Eosinophils	0.45	3.21579	2.01111	2.7	1.3
CBC - % Lymphocytes	0.787636	27.2421	30.1111	27.9	30.1
CBC - % Monocytes	0.694884	6.85789	6.16667	6.6	6.3
CBC - % Neutrophils	0.787636	62.2737	61.2444	61.4	60.8
CBC - Absolute Basophils	0.787636	26.6316	24.8889	22	29
CBC - Absolute Eosinophils	0.787636	210.684	107.667	147	64
CBC - Absolute Lymphocytes	0.983124	1735.16	1566.22	1646	1686
CBC - Absolute Monocytes	0.822	427.368	332.667	396	365
CBC - Absolute Neutrophils	0.787636	4074.05	3380	3572	3074
CBC - Hematocrit	0.6138	40.5579	42.5222	39.7	43.3
CBC - Hemoglobin	0.820645	13.0947	13.6667	12.8	13.9
CBC - MCH	0.673	29.9	30.0556	30.1	29.5
CBC - MCHC	0.787636	32.3053	32.1444	32.3	32
CBC - MCV	0.940431	90.9474	93.5111	92.3	93.2
CBC - MPV	0.983124	8.65	9.24444	8.45	8.9
CBC - Platelet Count	0.983124	227.111	226.889	227	228
CBC - RDW	0.983124	13.8632	13.8111	13.4	13.8
CBC - Red Blood Cell Count	0.799535	4.39737	4.56222	4.44	4.32
CBC - White Blood Cell Count	0.787636	6.47368	5.41111	6	5.6
Chloride	0.694884	103.889	102.778	103.5	103
CHOL/HDLC Ratio	0.06	4.4	2.67778	4.25	2.3
Cholesterol, Total	0.983124	196.111	176.111	203.5	165
Citric	0.822	282.923	376.4	246	285
Copper	0.822	116.611	112.143	115.5	115
Creatine Kinase (CK), Total	0.618857	77.9444	112	62	93
Creatinine	0.673	0.853889	0.756667	0.82	0.76
Creatinine, Random Urine	0.983124	5.87385	6.456	4.91	4.88
Cystine, 24-Hour Urine	0.673	99.5	55.25	83.5	52.5
Cytomegalovirus Antibodies (IgG)	0.983124	1.69694	1.98611	1.0305	0.891
Cytomegalovirus Antibodies (IgM)	0.820645	0.271667	0.227111	0.189	0.194
Decadienedioic	NA	0	0	0	0
Decanoylcarnitine, C10	0.983124	0.135779	0.0944444	0.06	0.09
Decenoylcarnitine, C10:1	0.694884	0.0642	0.0811111	0.05	0.09
Dodecanedioic	NA	0	0	0	0
Dodecanoylcarnitine, C12	0.983124	0.0368947	0.0332	0.02	0.02
Dodecenoylcarnitine, C12:1	0.799535	0.0414211	0.0810444	0.03	0.04
eGFR African American	0.673	106.438	120.25	99	123
eGFR Non-African American	0.673	92.3125	103.75	85	106
Epstein-Barr Virus Early Antigen D Antibody (IgG)	0.822	0.111111	0.222222	0	0
Epstein-Barr Virus Nuclear Antigen (EBNA) Antibody (IgG)	0.851802	0.842105	0.944444	1	1
Epstein-Barr Virus Viral Capsid Antigen (VCA) Antibody (IgG)	0.799535	0.944444	1	1	1
Epstein-Barr Virus Viral Capsid Antigen (VCA) Antibody (IgM)	NA	0	0	0	0
Estrogen, Total, Serum	0.673	206.147	254.456	161.9	179.7
Ethylmalonic	0.927714	1	2.8	0	0
Folate, Serum	0.820645	15.894	15.48	17.95	14.3
FSH	0.832142	41.0632	17.2111	14.1	5.9
Fumaric	0.822	1.61538	1	2	1
Globulin	0.798	2.58333	2.71111	2.5	2.8
Glucose	0.832142	91.2222	95.1111	89	88
Glutaconic	NA	0	0	0	0
Glutaric	0.851802	0.615385	4.8	1	0
Glutarylcarnitine, C5DC	0.740455	0.0249684	0.0309778	0.0194	0.03
Glycolic	0.833322	64.2308	48.6	46	47
Glyoxylic	NA	0	0	0	0
HDL Cholesterol	0.207	47.4444	70.4444	46	72
Hemoglobin A1C	0.798	6.18	6	6.2	6
Herpesvirus 6 Antibodies (IgG)	NA	1	1	1	1
Herpesvirus 6 Antibodies (IgM)	0.624	0.0555556	0	0	0
Herpesvirus 7 Antibody Panel (IgG), IFA	NA	0	0	0	0
Herpesvirus 7 Antibody Panel (IgM), IFA	NA	0	0	0	0
Hexadecanoylcarnitine, C16	0.983124	0.0831579	0.0788889	0.07	0.07
Hexadecenoyl, C16:1	0.983124	0.0245684	0.0276889	0.0196	0.02
Hexanolyglycine	NA	0	0	0	0
Hexanoylcarnitine, C6	0.983124	0.0311053	0.0295333	0.02	0.0196
Homocysteine	0.45	7.84211	10.2375	7.6	9.55
Homovanillic Acid	0.799535	6.30769	3.2	3	3
HSV 1 IgG Index	0.807371	0.361111	0.222222	0	0
HSV 1/2 IgM Index	0.851802	0.138889	0.111111	0	0
HSV 2 IgG Index	0.799535	0.333333	0.111111	0	0
Hydroxydecanedioic	NA	0	0	0	0
Immunoglobulin G, serum	0.508	960.368	1129.33	909	1219
Immunoglobulin G, subclass 1	0.339429	480.895	579.889	470	567
Immunoglobulin G, subclass 2	0.833322	349.263	373	329	397
Immunoglobulin G, subclass 3	0.624	45.9474	66.3333	45	58
Immunoglobulin G, subclass 4	0.983124	27.5211	43.8444	14.9	22.9
Iso-/Butyrylcarnitine, C4	0.45	0.161053	0.113333	0.13	0.09
Isobutyrylglycine	0.799535	0.0769231	0	0	0
Isocritic	0.787636	39.8462	57	38	62
Isovaleryl-2/-Methylbut C5	0.682054	0.14	0.113333	0.13	0.09
Isovalerylglycine	NA	0	0	0	0
Lactate Dehydrogenase (LD)	0.787636	132	153	137	154
Lactate/Pyruvate Ratio	0.673	53.6923	65.2	54	63
Lactic	0.983124	23.6923	24	15	15
Lactic Acid	0.940431	16.5692	17.56	16.8	19.4
LDL Cholesterol	0.459529	116.611	86.2222	115	80
LH	0.851802	20.6263	11	8.6	5.2
Linoleoylcarnitine, C18:2	0.45	0.0536737	0.0766667	0.04	0.07
Lyme Disease AB (IgG), Blot	NA	0	0	0	0
Lyme Disease AB (IgM), Blot	NA	0	0	0	0
Lymphocyte Subset Panel 1 - % CD16+CD56 (Natural Kills Cells)	0.983124	11.9474	13.8889	11	14
Lymphocyte Subset Panel 1 - % CD19 (B Cells)	0.787636	14.4211	13.3333	14	11
Lymphocyte Subset Panel 1 - % CD3 (Mature T Cells)	0.799535	72.6316	71.7778	73	75
Lymphocyte Subset Panel 1 - % CD4 (Helper Cells)	0.799773	46.4737	46.6667	45	50
Lymphocyte Subset Panel 1 - % CD8 (Suppressor T Cells)	0.799535	25.7895	24	25	23
Lymphocyte Subset Panel 1 - Absolute CD19+ Cells	0.822	249.989	234	237	184
Lymphocyte Subset Panel 1 - Absolute CD3+ Cells	0.983124	1293.53	1155.11	1008	1147
Lymphocyte Subset Panel 1 - Absolute CD4+ Cells	0.694884	842.368	738.556	640	707
Lymphocyte Subset Panel 1 - Absolute CD8+ Cells	0.851802	446.842	386.667	394	407
Lymphocyte Subset Panel 1 - Absolute Lymphocytes	0.983124	1762.58	1637.33	1659	1714
Lymphocyte Subset Panel 1 - Absolute NK Cells (CD16+CD56+Cells)	0.983124	198.368	232.222	180	188
Lymphocyte Subset Panel 1 - Helper/Suppressor Ratio	0.958909	2.17105	2.13778	1.9	1.88
Malic	0.799773	5.69231	3.8	5	3
Malonic	NA	0	0	0	0
Methylcitric	0.9776	0.538462	1.2	0	0
Methylenetetrahydrofolate Reductase (MTHFR), DNA Mutation Analysis	NA	NA	NA	NA	NA
Methylmalonic	0.624	0.153846	0	0	0
Methylmalonic Acid, GC/MS/MS	0.673	146.611	233.111	152.5	206
Methylmalonylcarn, C4DC	NA	0.018	0.019	0.018	0.019
Methylsuccinic	0.787636	1.23077	3.2	1	2
Mevalonic	NA	0	0	0	0
Mycoplasma Pneumoniae Antibodies (IgG)	0.983124	2.33105	2.12667	2.14	1.79
Mycoplasma Pneumoniae Antibodies (IgM)	0.673	186.105	195.778	98	128
N Acetylaspartic	0.787636	6.53846	4.8	6	3
N-Acetyltyrosine	0.983124	13.3846	0.2	0	0
NK Cells, Functional	0.983124	8.45	6.66667	5	5
Non HDL Cholesterol	0.673	144.222	105.667	151.5	98
Octanoic	0.822	0.0769231	0	0	0
Octanoylcarnitine, C8	0.798	0.0836211	0.0722222	0.04	0.05
Octenedioic	NA	0	0	0	0
Octenoylcarnitine, C8:1	0.787636	0.0904947	0.125556	0.07	0.1
OH Dodecanoylcarn, C12OH	NA	0.018	0.019	0.018	0.019
OH-Butyrylcarnitine, C4OH	0.983124	0.0217263	0.0236444	0.0186	0.0192
OH-Hexadecanoylcarn, C16OH	NA	0.018	0.019	0.018	0.019
OH-Hexadecenoyl, C16:1-OH	NA	0.018	0.019	0.018	0.019
OH-Hexanoylcarnitine, C6OH	NA	0.018	0.0192	0.018	0.0192
OH-Isovalerylcarnitine, C50OH	0.832142	0.0222	0.0239778	0.0192	0.0196
OH-Linoleoylcarn, C18:2-OH	NA	0.018	0.019	0.018	0.019
OH-Oleoylcarn, C18:1-OH	NA	0.018	0.019	0.018	0.019
OH-Tetradecanoylcarn, C14OH	NA	0.018	0.019	0.018	0.019
OH-Tetradecenoyl; C14:1-OH	NA	0.0182	0.019	0.0182	0.019
Oleoylcarnitine, C18:1	0.832142	0.135789	0.133333	0.1	0.12
Orotic	0.983124	10.6154	0.6	0	0
Parvovirus B19 Antibodies (IgG)	0.822	4.54444	3.58889	5.8	4.4
Parvovirus B19 Antibodies (IgM)	0.822	0.143889	0.155222	0.1	0.1
Phenylacetic	0.45	0	0.8	0	1
Phenyllactic	NA	0	0	0	0
Phenylpropionylglycine	NA	0	0	0	0
Phenylpyruvic	NA	0	0	0	0
Potassium	0.45	4.08333	4.27778	4.05	4.2
Propionylcarnitine, C3	0.45	0.354211	0.248889	0.31	0.2
Propionylglycine	NA	0	0	0	0
Protein, Total	0.339429	6.77222	7.31111	6.8	7.5
Pyruvic	0.799535	3.38462	5.4	4	4
Pyruvic Acid (Pyruvate)	0.962597	0.435	0.524444	0.33	0.3
Sebacic	NA	0	0	0	0
Serotonin, Serum	0.673	91.7667	131.429	93.5	124
Sex Hormone Binding Globulin	0.983124	58.6471	66.4444	51	46
Sodium	0.694884	139.333	138.222	139.5	138
Stearolylcarnitine, C18	0.983124	0.0363158	0.0366667	0.03	0.03
Suberic	0.983124	0.538462	0.6	1	1
Suberylcarnitine, C8DC	0.799535	0.018	0.0203111	0.018	0.0192
Suberylclycine	NA	0	0	0	0
Succinic	0.927714	7.30769	8.4	6	10
Succinylacetone	NA	0	0	0	0
T3 Free (FT3)	0.787636	3.37368	2.93333	3.2	2.9
T4 Free (FT4)	0.962597	1.22105	1.15556	1.1	1.1
Testosterone, Bioavailable	0.983124	33.2588	60.6222	5	3.1
Testosterone, Free	0.983124	16.9882	28.4	2.6	1.3
Testosterone, LC/MS/MS	0.983124	179.588	208.111	31	29
Tetradecadienoylcarn, C14:2	0.832142	0.0273158	0.0321556	0.0198	0.03
Tetradecanoylcarnitine, C14	0.983124	0.0228632	0.0238222	0.0194	0.0194
Tetradecenoylcarn, C14:1	0.983124	0.0483158	0.0422	0.03	0.03
Tiglyl/Methylcrotonyl, C5:1	0.983124	0.0190947	0.0203111	0.0186	0.0192
Tiglylglycine	NA	0	0	0	0
Triglycerides	0.822	154.778	96.3333	136.5	88
TSH	0.983124	2.14632	1.55667	1.49	1.82
Uracil	0.799535	5.92308	16.6	4	4
Urea Nitrogen (Bun)	0.799535	14.7222	12.7778	14	14
Uric Acid	0.983124	4.58889	4.55556	4.45	4.4
Vitamin B12	0.45	1038.39	559.556	756	314
Vitamin B7 (Biotin)	0.843517	1238.26	976.933	1040.55	885.5
Vitamin D, 25-Hydroxy, Total, Immunoassay	0.983124	44.3311	25.5556	45	21
VMA	0.822	1.76923	3.2	2	1
Cortisol.S1	0.0048	0.2715	0.4653	0.1985	0.44825
Cortisol.S2	0.0348	0.215579	0.09065	0.1505	0.09375
Cortisol.S3	0.0976	0.229583	0.0744	0.10275	0.049
Cortisol.S4	0.0976	0.260441	0.0544444	0.093	0.036

## Sheet: Table S2
	Viral Antibodies	Viral Antibodies	Clinical Lab	#Patients detected	%Patients detected	#Controls detected	%Controls detected	Significance
		Herpes Simplex Virus (HSV-1, HHV-1) IgG Index	Quest Diagnostics	6/17	0.352941	2/9	0.222222	NS
		Herpes Simplex Virus (HSV-2, HHV-2) IgG Index	Quest Diagnostics	6/18	0.333333	1/9	0.111111	NS
		Herpes Simplex Virus-1/2 IgM Index	Quest Diagnostics	2/17	0.117647	1/9	0.111111	NS
		Epstein-Barr Virus (EBV, HHV-4) Viral Capsid Antigen (VCA) IgG	Quest Diagnostics	17/18	0.944444	9/9	1	NS
		Epstein-Barr Virus Nuclear Antigen (EBNA) IgG	Quest Diagnostics	16/19	0.842105	8/8	1	NS
		Epstein-Barr Virus Early Antigen D IgG	Quest Diagnostics	2/18	0.111111	2/9	0.222222	NS
		Epstein-Barr Virus VCA IgM	Quest Diagnostics	0/18	0	0/9	0	NS
		Cytomegalovirus (CMV, HHV-5) IgG	Quest Diagnostics	9/18	0.5	4/9	0.444444	NS
		Cytomegalovirus IgM	Quest Diagnostics	1/18	0.0555556	0/9	0	NS
		Herpesvirus 6 (HHV-6) IgG	Quest Diagnostics	19/19	1	9/9	1	NS
		Herpesvirus 6 IgM	Quest Diagnostics	1/18	0.0555556	0/9	0	NS
		Herpesvirus 7 (HHV-7) IgG	Quest Diagnostics	0/19	0	0/9	0	NS
		Herpesvirus 7 IgM	Quest Diagnostics	0/18	0	0/9	0	NS
		Parvovirus B19 IgG	Quest Diagnostics	14/18	0.777778	6/9	0.666667	NS
		Parvovirus B19 IgM	Quest Diagnostics	0/18	0	0/9	0	NS
	Bacterial Antigen and Antibodies	Bacterial Antigen and Antibodies	Clinical Lab	#Patients detected	%Patients detected	#Controls detected	%Controls detected	Significance
		Borrelia (Ceres Nano Lyme Test)	Ceres Nanosciences	2/18	0.111111	1/10	0.1	NS
		Lyme Disease AB IgG, Blot	Quest Diagnostics	0/18	0	0/9	0	NS
		Lyme Disease AB IgM, Blot	Quest Diagnostics	0/18	0	0/9	0	NS
		Borrelia burgdorferi 18 KD (IgG) Band	Quest Diagnostics	0/18	0	0/9	0	NS
		Borrelia burgdorferi 23 KD (IgG) Band	Quest Diagnostics	2/18	0.111111	0/9	0	NS
		Borrelia burgdorferi 28 KD (IgG) Band	Quest Diagnostics	0/18	0	0/9	0	NS
		Borrelia burgdorferi 30 KD (IgG) Band	Quest Diagnostics	2/18	0.111111	1/9	0.111111	NS
		Borrelia burgdorferi 39 KD (IgG) Band	Quest Diagnostics	0/18	0	0/9	0	NS
		Borrelia burgdorferi 41 KD (IgG) Band	Quest Diagnostics	12/18	0.666667	4/9	0.444444	NS
		Borrelia burgdorferi 45 KD (IgG) Band	Quest Diagnostics	0/18	0	0/9	0	NS
		Borrelia burgdorferi 58 KD (IgG) Band	Quest Diagnostics	0/18	0	0/9	0	NS
		Borrelia burgdorferi 66 KD (IgG) Band	Quest Diagnostics	2/18	0.111111	1/9	0.111111	NS
		Borrelia burgdorferi 93 KD (IgG) Band	Quest Diagnostics	0/18	0	0/9	0	NS
		Borrelia burgdorferi 23 KD (IgM) Band	Quest Diagnostics	1/18	0.0555556	0/9	0	NS
		Borrelia burgdorferi 39 KD (IgM) Band	Quest Diagnostics	0/18	0	0/9	0	NS
		Borrelia burgdorferi 41 KD (IgM) Band	Quest Diagnostics	1/18	0.0555556	1/9	0.111111	NS
		Mycoplasma pneumoniae IgG	Quest Diagnostics	13/18	0.722222	6/7	0.857143	NS
		Mycoplasma pneumoniae IgM	Quest Diagnostics	1/19	0.0526316	0/9	0	NS
		Bartonella species DNA - Blood	Galaxy Diagnostics	0/20	0	0/9	0	NS
		Bartonella species DNA - Serum	Galaxy Diagnostics	0/20	0	0/9	0	NS
		Bartonella species - Culture (8 days)	Galaxy Diagnostics	0/20	0	0/9	0	NS
		Bartonella species - Culture (14 days)	Galaxy Diagnostics	0/20	0	0/9	0	NS
		Bartonella species - Culture (21 days)	Galaxy Diagnostics	0/20	0	0/9	0	NS
		Bartonella henselae IgG IFA	Galaxy Diagnostics	18/20	0.9	8/9	0.888889	NS
		Bartonella quintana IgG IFA	Galaxy Diagnostics	17/20	0.85	7/9	0.777778	NS
	IgG Subclasses and Total IgG	IgG Subclasses and Total IgG	Clinical Lab	#Patients low	#Patients high	#Controls low	#Controls high	Significance
		Immunoglobulin G, subclass 1	Quest Diagnostics	1/19	0/19	0/9	0/9	NS
		Immunoglobulin G, subclass 2	Quest Diagnostics	0/19	0/19	2/9	0/9	NS
		Immunoglobulin G, subclass 3	Quest Diagnostics	3/19	0/19	0/9	0/9	NS
		Immunoglobulin G, subclass 4	Quest Diagnostics	1/19	0/19	2/9	1/9	NS
		Immunoglobulin G, serum	Quest Diagnostics	0/19	0/19	0/9	0/9	NS
